# Supplementary material for: Hydrogen-bond directionality at the donor H atom—analysis of interaction energies and database statistics
Source: Royal Society of Chemistry journal article supplement (doi:10.1039/b902330e), 2009-01-01

## Supplementary Materials

**Figure S1:** IMPT intermolecular interaction energy calculation results for the methanol to pyridine dimer showing the breakdown of the energy into component parts. The graph shows the variation of each of the energy components with the change in O-H...N angle ( $^{\circ}$ ), the H...N distance is kept fixed at the minimum energy value of 2.0 Å.

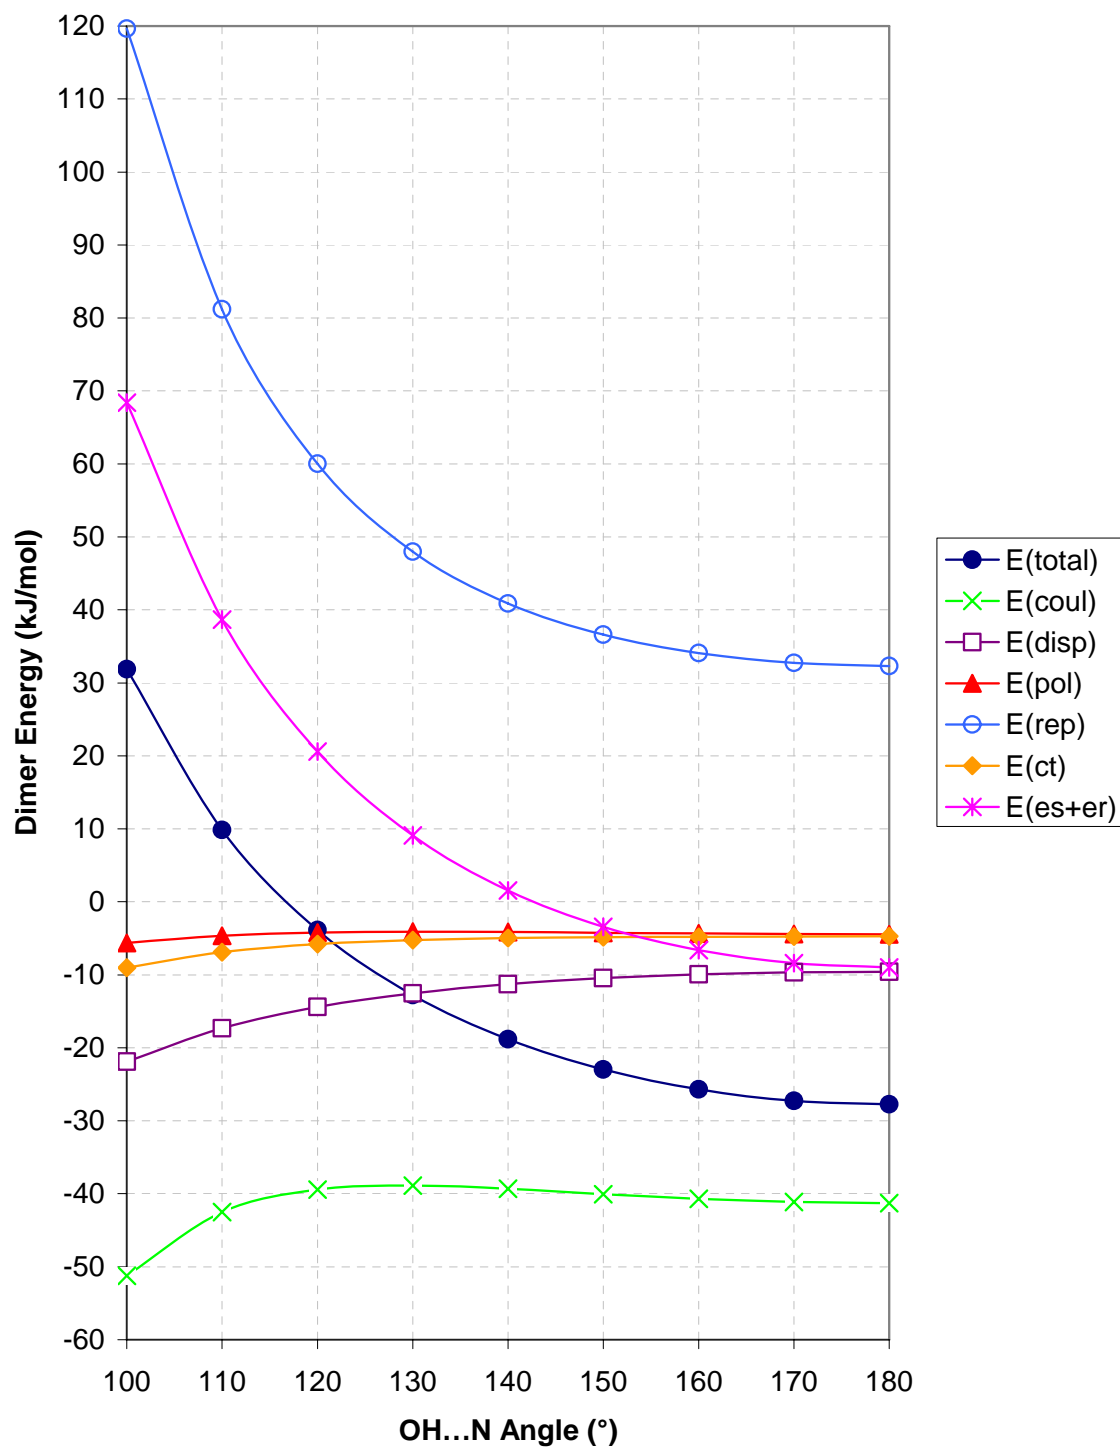

**Figure S2:** IMPT intermolecular interaction energy calculation results for the acetylene to pyridine dimer showing the breakdown of the energy into component parts. The graph shows the variation of each of the energy components with the change in C-H...N angle ( $^{\circ}$ ), the H...N distance is kept fixed at the minimum energy value of 2.1 Å.

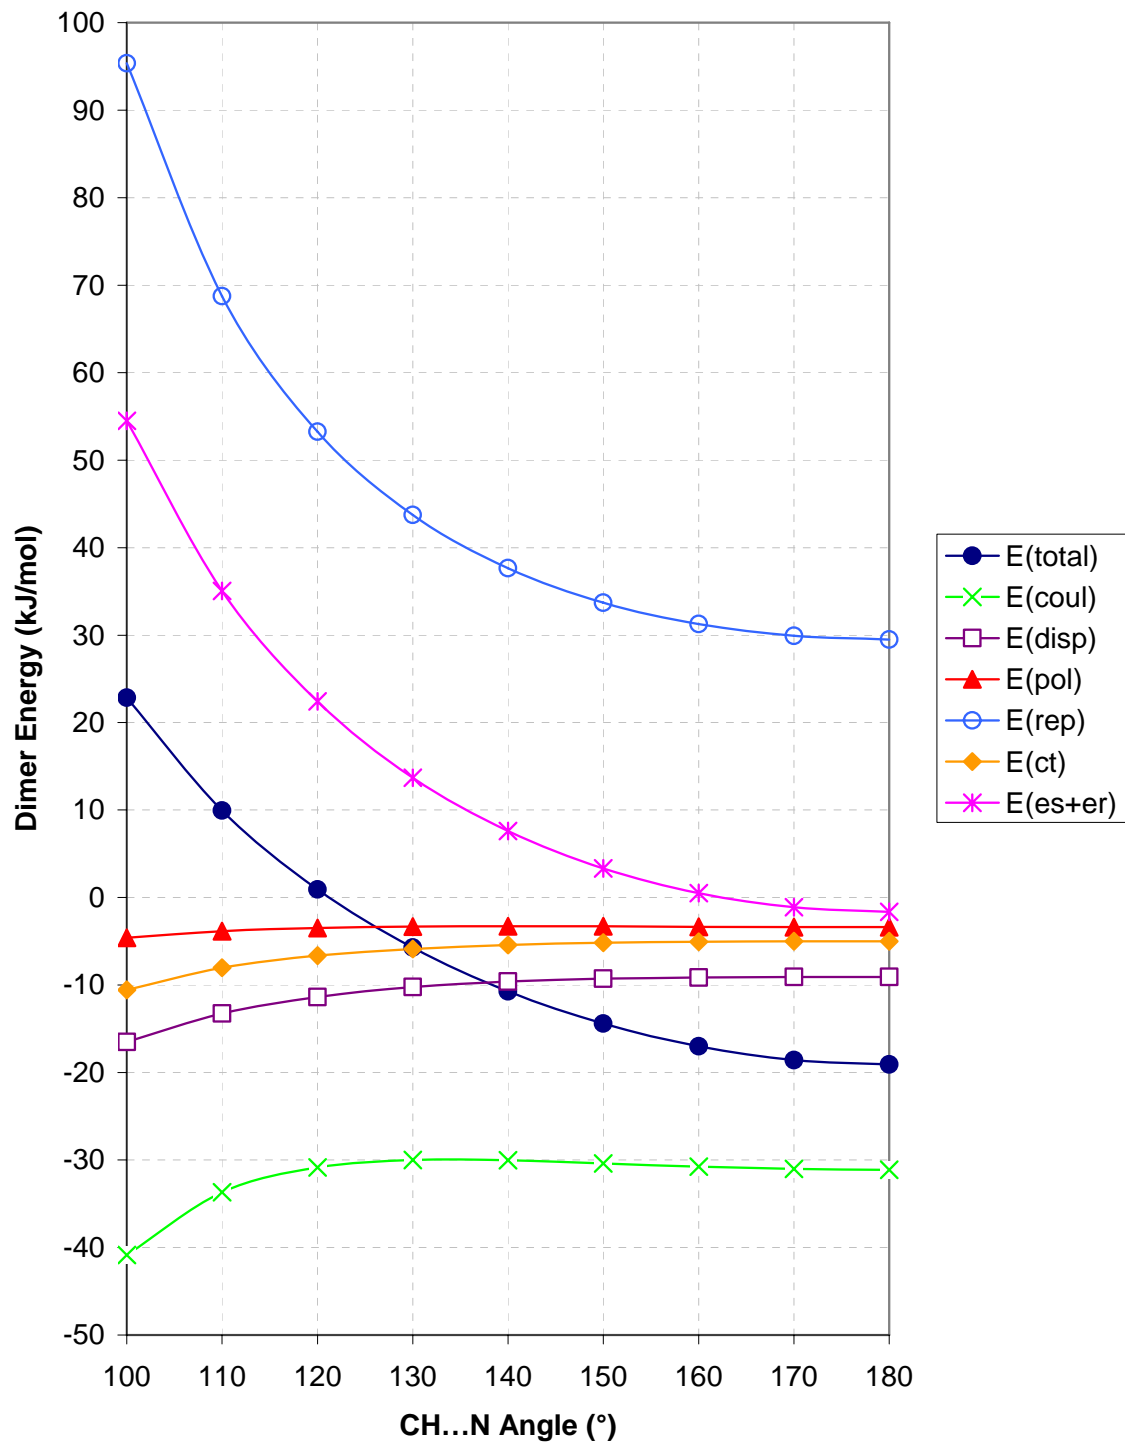

**Figure S3:** IMPT intermolecular interaction energy calculation results for the benzene to pyridine dimer showing the breakdown of the energy into component parts. The graph shows the variation of each of the energy components with the change in C-H...N angle ( $^{\circ}$ ), the H...N distance is kept fixed at the minimum energy value of 2.4 Å.

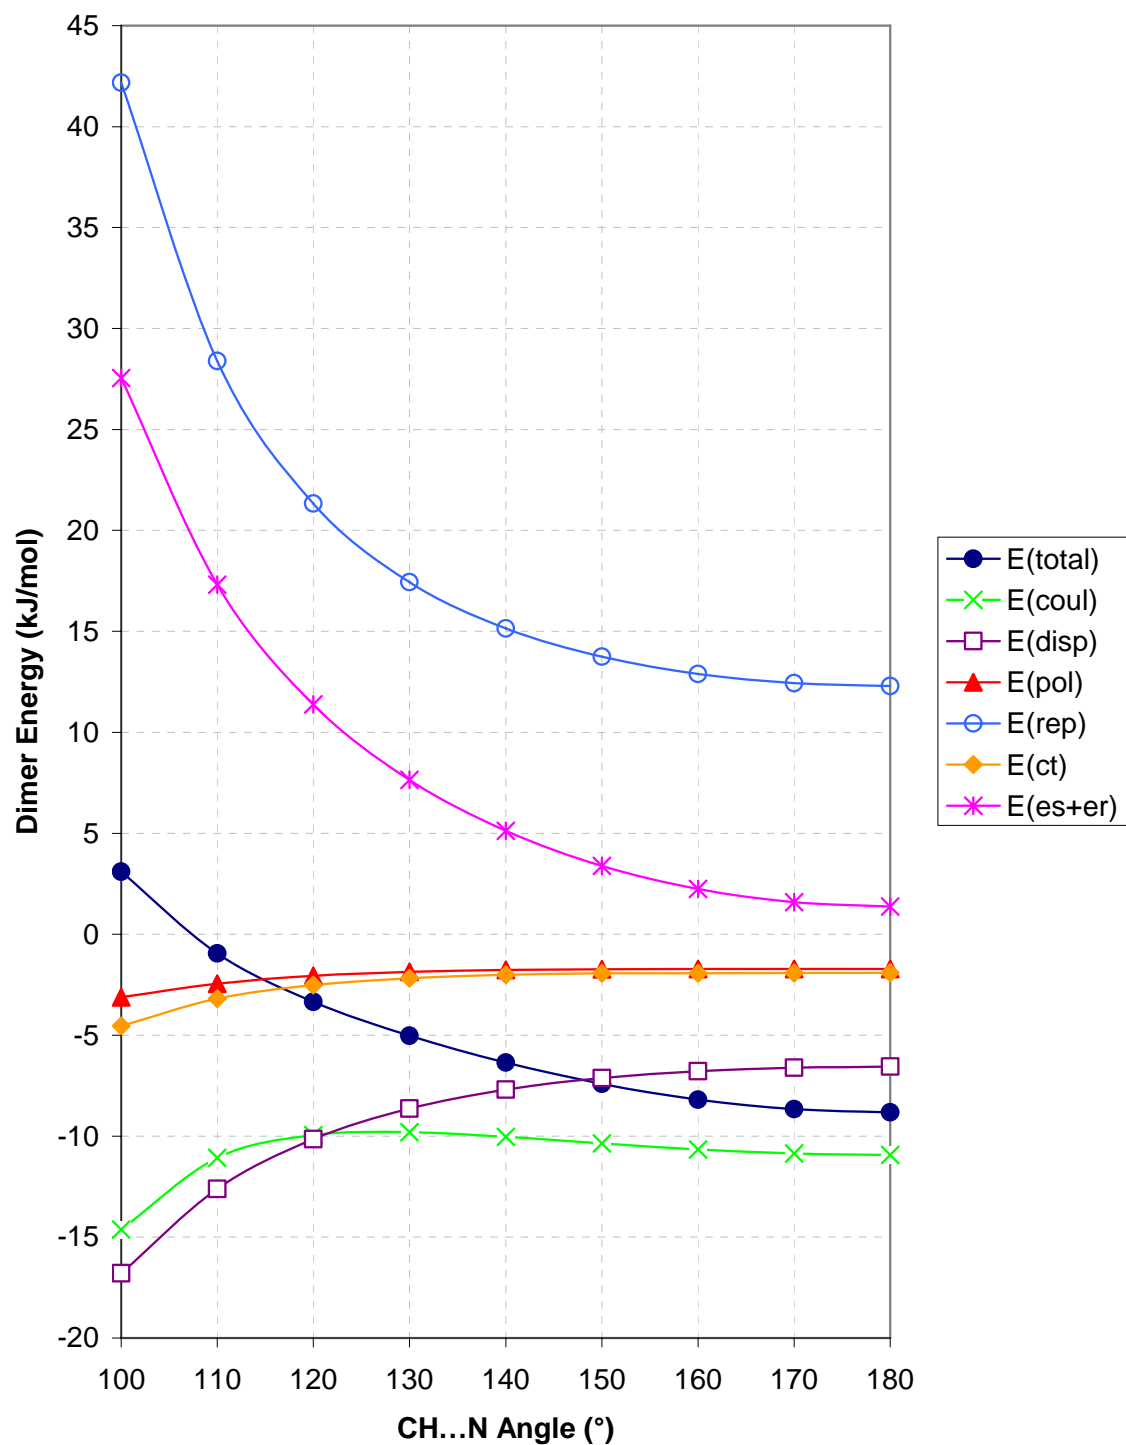

Supplement: b902330e.pdf [file b902330e.pdf]
